# Supplementary material
Source: Springer Nature journal article supplement (https://www.springermedizin.de/resource/supplementary/12985_2012_2134_MOESM1_ESM.pdf/9606692)
Supplement: MOESM1 [file 9606692]

|    | 1    | 2    | 3    | 4    | 5    | 6    | 7    | 8    | 9    | 10   | 11   | 12   | 13   | 14   | 15   | 16   | 17   | 18   |    |            |
|----|------|------|------|------|------|------|------|------|------|------|------|------|------|------|------|------|------|------|----|------------|
| 1  |      | 99.8 | 4.0  | 2.7  | 50.2 | 90.4 | 90.7 | 90.5 | 82.5 | 90.8 | 53.4 | 87.4 | 53.9 | 93.0 | 80.7 | 50.9 | 2.7  | 53.9 | 1  | 4F         |
| 2  | 99.5 |      | 4.0  | 2.7  | 50.2 | 90.5 | 90.8 | 90.6 | 82.4 | 90.8 | 53.3 | 87.4 | 53.9 | 93.0 | 80.7 | 50.9 | 2.7  | 53.8 | 2  | 4S         |
| 3  | 7.8  | 7.8  |      | 45.3 | 3.3  | 3.9  | 4.5  | 3.9  | 1.0  | 4.5  | 4.8  | 4.3  | 4.8  | 2.6  | 4.3  | 3.3  | 27.4 | 3.9  | 3  | B219       |
| 4  | 5.5  | 5.5  | 36.5 |      | 1.8  | 2.4  | 1.7  | 2.7  | 0.7  | 1.7  | 1.6  | 5.6  | 1.6  | 4.5  | 2.1  | 1.9  | 93.7 | 1.6  | 4  | Bang373    |
| 5  | 40.6 | 40.8 | 12.8 | 4.8  |      | 53.5 | 52.3 | 52.0 | 55.8 | 52.3 | 83.0 | 55.0 | 83.6 | 56.6 | 57.4 | 98.7 | 1.7  | 83.2 | 5  | Cowden     |
| 6  | 97.0 | 97.0 | 8.1  | 8.8  | 40.3 |      | 90.5 | 90.3 | 81.5 | 90.6 | 52.8 | 90.4 | 52.5 | 90.0 | 80.7 | 53.2 | 1.8  | 52.7 | 6  | CRW-8      |
| 7  | 97.2 | 97.2 | 9.6  | 6.3  | 36.4 | 96.7 |      | 95.7 | 81.5 | 99.8 | 52.8 | 87.3 | 53.0 | 89.9 | 79.9 | 52.6 | 4.9  | 52.9 | 7  | DN30209    |
| 8  | 98.0 | 98.0 | 8.1  | 6.5  | 40.1 | 97.5 | 99.2 |      | 81.7 | 95.8 | 52.4 | 87.1 | 53.0 | 90.2 | 79.1 | 52.7 | 1.7  | 52.9 | 8  | GD         |
| 9  | 93.5 | 93.5 | 9.3  | 5.5  | 40.8 | 92.7 | 93.2 | 93.2 |      | 81.5 | 56.0 | 80.0 | 55.8 | 82.6 | 80.0 | 57.0 | 1.3  | 55.7 | 9  | Gottfried  |
| 10 | 97.5 | 97.5 | 8.3  | 6.5  | 40.1 | 97.0 | 99.2 | 99.5 | 93.2 |      | 52.4 | 87.4 | 52.4 | 89.9 | 80.0 | 52.5 | 4.9  | 52.4 | 10 | JL94       |
| 11 | 41.8 | 42.1 | 6.8  | 8.5  | 86.9 | 41.6 | 37.5 | 41.3 | 41.3 | 41.3 |      | 52.7 | 97.1 | 57.4 | 57.3 | 82.1 | 2.4  | 97.2 | 11 | Moduganari |
| 12 | 99.5 | 99.5 | 8.1  | 6.5  | 40.8 | 97.5 | 97.2 | 98.0 | 93.5 | 97.5 | 42.1 |      | 52.4 | 87.2 | 78.8 | 55.4 | 4.6  | 52.9 | 12 | OSU        |
| 13 | 41.8 | 42.1 | 7.1  | 8.8  | 88.9 | 41.6 | 41.3 | 41.3 | 41.3 | 41.3 | 99.5 | 42.1 |      | 58.0 | 57.3 | 82.6 | 2.4  | 98.2 | 13 | Preston    |
| 14 | 99.2 | 99.2 | 8.1  | 6.5  | 40.8 | 97.7 | 98.0 | 98.7 | 98.2 | 98.2 | 42.1 | 99.2 | 42.1 |      | 79.5 | 55.9 | 2.8  | 56.6 | 14 | RUI72      |
| 15 | 90.7 | 90.7 | 9.3  | 7.3  | 41.8 | 89.9 | 90.2 | 90.2 | 90.2 | 90.2 | 42.8 | 90.7 | 42.8 | 90.7 |      | 57.0 | 2.5  | 57.4 | 15 | TUCH       |
| 16 | 40.1 | 40.3 | 11.6 | 4.1  | 97.7 | 39.8 | 36.5 | 39.5 | 39.5 | 39.5 | 87.7 | 40.3 | 87.7 | 40.3 | 41.1 |      | 1.8  | 82.3 | 16 | WD534tc    |
| 17 | 5.5  | 5.5  | 36.8 | 97.5 | 5.5  | 7.6  | 5.5  | 5.5  | 5.5  | 5.5  | 7.3  | 5.5  | 7.3  | 5.5  | 8.3  | 5.0  |      | 2.5  | 17 | WH-1       |
| 18 | 41.8 | 42.1 | 7.1  | 8.5  | 87.6 | 41.6 | 37.5 | 41.3 | 41.3 | 41.3 | 99.1 | 42.1 | 99.7 | 42.1 | 42.8 | 86   | 6.5  |      | 18 | Wu82       |
